# Supplementary material for: Effects of surface and shear forces on nano-confined smectic-A liquid crystals studied by X-ray diffraction
Source: Royal Society of Chemistry journal article supplement (doi:10.1039/d0cp04266h), 2020-10-20
Supplement: d0cp04266h1.pdf [file d0cp04266h1.pdf]

**Supplemental Material For:**

**Effect of Surface and Shear on Nano-Confined  
Smectic-A Liquid Crystal Studied by X-Ray  
Diffraction**

*Masashi Mizukami,<sup>a\*</sup> Noboru Ohta,<sup>b</sup> Kazuhito Tomita,<sup>a</sup> Takuya Yanagimachi,<sup>c</sup> Yuuta Shibuya,<sup>c</sup>*

*Naoto Yagi,<sup>b</sup> and Kazue Kurihara<sup>c\*</sup>*

- a. Institute of Multidisciplinary Research for Advanced Materials, Tohoku University,  
Katahira 2-1-1, Aoba-ku, Sendai 980-8577, Japan
- b. Japan Synchrotron Radiation Research Institute/SPring-8, Sayo, Hyogo 679-5198, Japan
- c. New Industry Creation Hatchery Center, Tohoku University, 2-1-1 Katahira, Aoba-ku,  
Sendai 980-8577, Japan

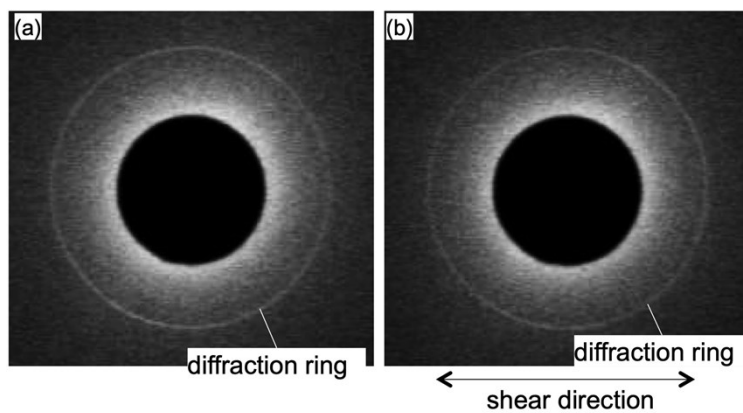

Fig.S1 X-ray diffraction images of 8CB confined between silica surfaces obtained at  $D_{\text{HW}}$  (= ca. 2 nm) (a) without shear, (b) under shear (input voltage  $U_{\text{in}} = 10$  V, frequency  $f = 96.5$  Hz). The black circular spot at the center of the diffraction images corresponds to the shadow of a beam stopper for the direct X-ray beam.
